# Supplementary material for: Estrogen receptor alpha isoform ERdelta7 in myometrium modulates uterine quiescence during pregnancy
Source: PubMed Central journal article supplement — eBioMedicine. 2018 Nov 28;39:520–30. doi: 10.1016/j.ebiom.2018.11.038 (PMC6355643; doi:10.1016/j.ebiom.2018.11.038), 2018-11-28

## Supplementary Table 1

Human Forward and Reverse Primers for conventional and Real-time quantitative PCR

| mRNA                                       | Primer/Probe Sequence                                                | Amplicon length                                                                                | NCBI Accession # |
|--------------------------------------------|----------------------------------------------------------------------|------------------------------------------------------------------------------------------------|------------------|
| <b>Conventional PCR</b>                    |                                                                      |                                                                                                |                  |
| ESR1                                       | F: 5'-TGCCTTGTTGGATGCTGAGC-3'<br>R: 5'-AGCATCTCCAGCAGCAGGTCATAG-3'   | Exon7 inclusion 681 bp (ER $\alpha$ 66/46)<br>Exon7 exclusion 497 bp (ER $\Delta$ 7)           | NM_001122742     |
|                                            | F: 5'-TTCTATAGCATAAGAAGACAG-3'<br>R: 5'-GCCTGAAGCATAGTCATTGC-3'      | Exon1 inclusion 830 bp (ER $\alpha$ 66/ $\Delta$ 7)<br>Exon1 exclusion 308 bp (ER $\alpha$ 46) |                  |
| <b>RT-qPCR</b>                             |                                                                      |                                                                                                |                  |
| ER $\alpha$ 66/46                          | F: 5'-ATCCTCTCCCACATCAGGCA-3'<br>R: 5'-ATGAAGTAGAGCCCGCAGTG-3'       | 199 bp                                                                                         | NM_000125        |
| ER $\Delta$ 7                              | F: 5'-AATGTGTAGAGGGCATGGTGG-3'<br>R: 5'-CCATGCCTTTGTTACAGAATTAAGC-3' | 137 bp                                                                                         | XM_006715374     |
| hnRNPG                                     | F: 5'-TGGAAGAGGAGGAAGTGGAGG-3'<br>R: 5'-GGTCCCCTGGAAGAACTCAT-3'      | 105 bp                                                                                         | NM_002139        |
| RPLP0                                      | F: 5'-GTGCTGATGGGCAAGAACAC-3'<br>R: 5'-TGGTGAACACAAAGCCCACA-3'       | 118 bp                                                                                         | NM_001002        |
| Human ER $\alpha$ exon 2 end labeled probe | Probe: 5'-CCAGGGTGGCAGAGAAAGAT-3'                                    | Used as probe for 830 bp and 308 bp ER $\alpha$ 66/46 RTPCR southern Supplementary Figure 2C.  | NM_001122742     |

## Supplementary Figure Legends:

**Supplementary Figure 1: Immunolocalization of ER $\alpha$  and ER $\beta$  in the pregnant human uterus.** A representative uterine section from pregnant non-laboring women (36 weeks gestation) shows (A) ER $\alpha$  immunostaining in both the endometrium (arrows) and myometrium (arrow heads) while (B) ER $\beta$  staining is limited to the endometrium.

**Supplementary Figure 2: Structure of the human ER $\alpha$  isoforms produced from the ESR1 gene.** (A) The mRNA coding sequences (CDS) of 3 ER $\alpha$  isoforms found in the myometrium are shown. ER $\alpha$ 66 mRNA is the full-length isoform containing exons 1-8 and translation is initiated from the first AUG in exon 1. ER $\alpha$ 46 mRNA is an exon 1 skip isoform (translation starts at an AUG in exon 2), while ER $\Delta$ 7 is an exon 7 skip variant of ER $\alpha$  causing translation to be truncated due to a frameshift and a premature stop codon in exon 8 (denoted by \*). (B) The full length ER $\alpha$  (ER $\alpha$ 66, 595 a.a.) protein structure showing the functional domains: NTD- amino terminal domain, DBD- DNA binding domain, D- hinge region, LBD- ligand binding domain and F domain is located towards the C-terminal end. The two activation function domains AF-1 (hormone-independent) and AF-2 (hormone-dependent) regulate the transcriptional activity of ER $\alpha$ 66. ER $\alpha$ 46 contains amino acids corresponding to residues numbered 174-595 in ER $\alpha$ 66 and lacks the AF-1 domain. ER $\Delta$ 7 (a 51 KD protein) has a truncated LBD (E\*) with variant-specific 10 amino acid sequences (456-466) and lacks the AF-2 domain. (C) RT-PCR analysis of preterm non-laboring (PTNL) and term non-laboring (TNL) human myometrium utilizing primers that spanned exon E1 and exon 2 produced two bands, a 830 bp representing the ER $\alpha$ 66/ER $\Delta$ 7 and a 308 bp lacked exon 1 and was consistent with

*ER $\alpha$ 46*. An RT-PCR southern was performed using a p32 end labeled oligonucleotide probe with sequence homology to exon 2. Both bands hybridized to the probe as shown in autoradiographs. Sequencing confirmed southern analysis. (D) RT-PCR analysis of preterm human myometrium utilizing primers that spanned exon 4 through exon 8 of the *ESR1* mRNA reveal the presence of two bands, a 681 bp representing the *ER $\alpha$ 66/ER $\alpha$ 46* isoforms and a 497 bp product which when sequenced was shown to lack exon 7 corresponding to *ER $\Delta$ 7*.

**Supplementary Figure 3: siRNA knockdown of ER $\alpha$ 66 and ER $\alpha$ 46 depletes the levels of GJA1 in vitro.** HTERT-HM cells were transfected with ER $\alpha$  siRNA targeting the exon 7 of *ESR1* mRNA which targets *ER $\alpha$ 66* and *ER $\alpha$ 46* for knockdown but not *ER $\Delta$ 7*. Cytosolic and nuclear fractions were isolated and analyzed for ER $\alpha$ 66, ER $\alpha$ 46 and GJA1 proteins. siRNA knockdown of ER $\alpha$ 66 and ER $\alpha$ 46 led to the downregulation of GJA1. A representative blot from three different experiments is shown.

**Supplementary Figure 4: Doxycycline dose dependence of ER $\Delta$ 7 expression and nuclear localization of ER $\Delta$ 7.** (A) Doxycycline inducible expression of functional ER $\Delta$ 7. ER $\Delta$ 7 was transiently over-expressed in hTERT-HM<sup>Tet3G</sup> cells with a doxycycline (Dox) inducible recombinant lentivirus and treated with varying concentrations of Dox (0 to 1000 ng/ml) for 48 hr. Increased expression of ER $\Delta$ 7 (nuclear fraction) and down-regulation of GJA1 (cytoplasmic fraction) in a Dox responsive/ER $\Delta$ 7 concentration dependent manner was observed. GAPDH and NCOA3 are cytoplasmic and nuclear loading controls. (B) Nuclear localization of ER $\Delta$ 7 in HEK293T cells. Cells were co-

transfected with recombinant ER $\Delta$ 7 plasmid (pLVX-TREG-mCherry-ER $\Delta$ 7; 2 $\mu$ g) along with transactivator rtTA plasmid (pLVX-EF1a-Tet3G; 2 $\mu$ g) and cultured in the presence or absence of DOX (500 ng/ml) for 48hr. Cytosolic (Cyto) and nuclear (Nuc) fractions were isolated and analyzed for ER $\Delta$ 7 expression. Western blot shows abundant nuclear localization of ER $\Delta$ 7 in HEK293T cells. GAPDH and NCOA3 are cytoplasmic and nuclear loading controls. A representative blot from three different experiments is shown.

Supplementary Figure 1

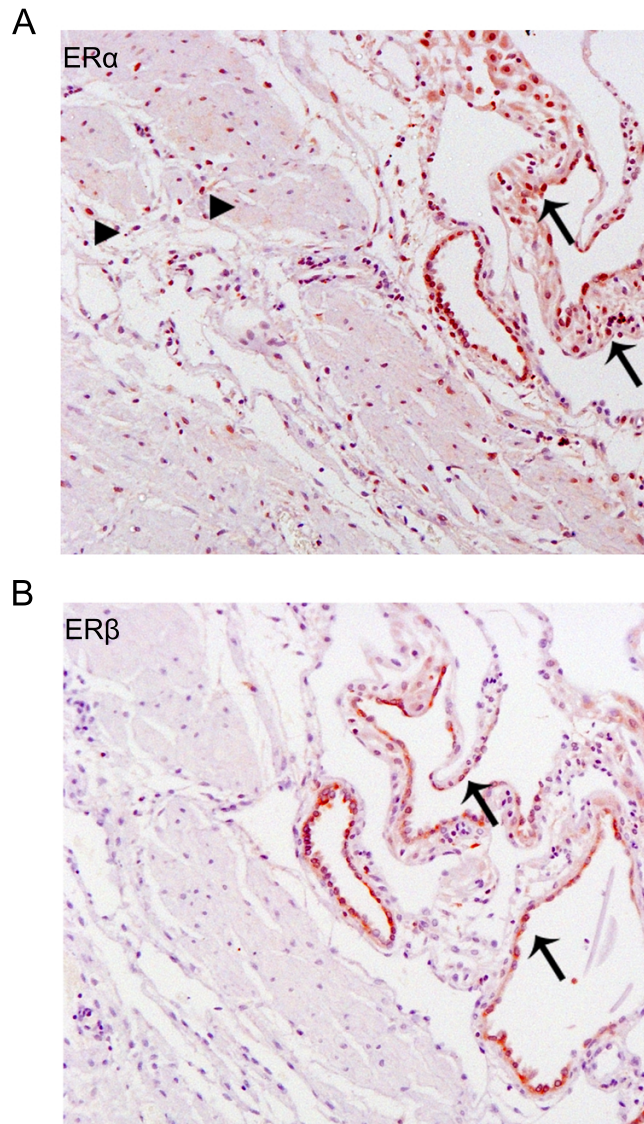

Supplementary Figure 2

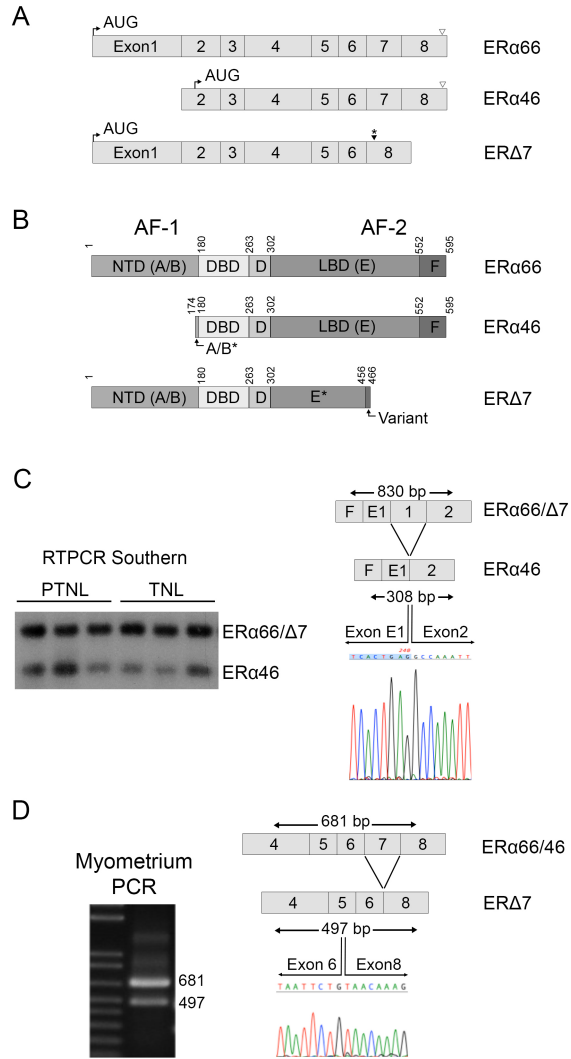

### Supplementary Figure 3

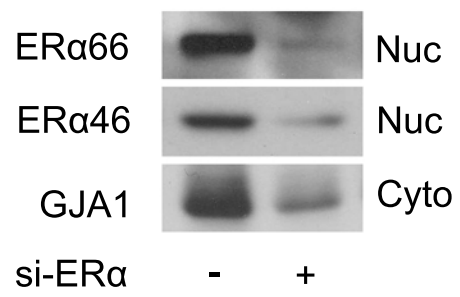

Supplementary Figure 4

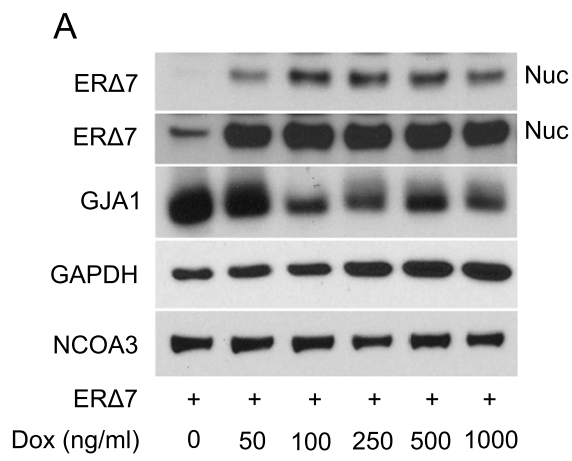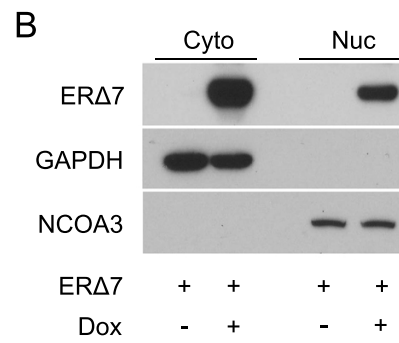

Supplement: mmc1.pdf [file mmc1.pdf]
